# Supplementary material
Source: PubMed Central journal article supplement (PMC7668347)
Supplement: hae-13-e008920-s001.pdf [file hae-13-e008920-s001.pdf]

# SUPPLEMENTAL MATERIAL

## Table of Contents:

|          |                                                                                                                                            |
|----------|--------------------------------------------------------------------------------------------------------------------------------------------|
| Page 2:  | Disclosures                                                                                                                                |
| Page 3:  | Study Definition Details                                                                                                                   |
| Page 4:  | Statistical Considerations                                                                                                                 |
| Page 5:  | Table S1: Telemetry <i>vs</i> No Telemetry Patients that Died: Selected Demographics, Clinical Characteristics, Laboratory Data & Outcomes |
| Page 6:  | Table S2: Descriptive Analysis of Acute Malignant Cardiac Events, and Relationship to Death                                                |
| Page 7:  | Table S3: Descriptive Analysis of Patients with AV block                                                                                   |
| Page 8:  | Table S4: Predictors of Mortality – Univariable Analysis                                                                                   |
| Page 9:  | Table S5: Predictors of Mortality – Multivariable Binary Logistic Regression Analysis                                                      |
| Page 10: | Table S6: 12-Lead Electrocardiographic and Telemetric Monitoring                                                                           |
| Page 12: | Table S7: Descriptive Analysis of Available Echocardiographic Imaging                                                                      |
| Page 13: | Figure S1: Cardiac Arrhythmias                                                                                                             |
| Page 14: | References                                                                                                                                 |

## **Disclosures**

Vivek Reddy's disclosures with medical companies (unrelated to this manuscript) include: Abbott (Consultant), Acutus Medical (Consultant, Equity), Affera (Consultant, Equity), Apama Medical (Consultant, Equity), Aquaheart (Consultant, Equity), Autonomix (Consultant, Equity), Axon (Consultant), Backbeat (Consultant, Equity), BioSig (Consultant, Equity), Biotronik (Consultant), Cardiofocus (Consultant), Cardionomic (Consultant), CardioNXT / AFTx (Consultant), Circa Scientific (Consultant, Equity), Corvia Medical (Consultant, Equity), Dinova (Consultant, Equity), East End Medical (Consultant, Equity), EBR (Consultant), EPD (Consultant, Equity), Epix Therapeutics (Consultant, Equity), EpiEP (Consultant, Equity), Eximo (Consultant, Equity), Impulse Dynamics (Consultant), Javelin (Consultant, Equity), Keystone Heart (Consultant, Equity), LuxCath (Consultant, Equity), Manual Surgical Sciences (Equity), Medlumics (Consultant, Equity), Medtronic (Consultant), Middlepeak (Consultant, Equity), Newpace (Equity), Nuvera (Consultant, Equity), Philips (Consultant), Stimda (Consultant), Surecor (Equity), Thermedical (Consultant), Valcare (Consultant, Equity), Vizara (Equity) and VytronUS (Consultant, Equity).

Jacob Koruth's disclosures with other medical companies include: Consultant – Medtronic, Vytronus, Abbott and Cardiofocus; Grant Support - Vytronus, Cardiofocus, Luxcath, Affera, LuxCath and Medlumics.

### **Study Definition Details**

- Acute respiratory distress syndrome was defined by moderate to severe hypoxemia,  $\text{PaO}_2:\text{FiO}_2 < 200$  (ratio of partial pressure of arterial oxygenation to fractionated inspired oxygenation) and bilateral pulmonary infiltrates on chest imaging unexplained by heart failure.
- Acute kidney injury was identified by a rise in serum creatinine of  $\geq 0.3$  mg/dl within 48 hours; or  $\geq 1.5$  times the baseline value within 7 days.
- Septic shock was defined according to the 3<sup>rd</sup> international consensus definitions for sepsis and septic shock guidelines.

## Statistical Considerations

Covid-19 patients with cardiac injury (defined by elevated Troponin levels) have a higher incidence of adverse outcomes, including requiring mechanical ventilation and death. Covid-19 patients have reportedly high rates of cardiac arrhythmias (though poorly defined in most studies), ranging from 16.7% to 30.3%, with the highest rates being reported in critically ill patients, ranging from 44.4% to 74.6% (Wang et al). Accordingly, we hypothesized that Covid-19 patients that die will have a substantially higher incidence of acute malignant cardiac arrhythmias (AMCAs = VT/VF or AV block) than Covid-19 patients that survive to discharge.

For the power calculation, the incidence of AMCAs in the Mortality group is estimated to be 17%, based on Guo et al who reported a 17.3% rate of “malignant arrhythmia” (defined as >30 sec VT or VF) in patients with abnormal Troponin levels. Similarly, they reported a 1.5% rate of “malignant arrhythmia” in patients with normal troponin levels; accordingly, the estimated incidence of AMCAs in the discharged group is 3%.

In this retrospective/prospective study, consecutive patients were enrolled. We did not know what the relative rate of accrual between the two groups would be. Thus, if we required an equal number of patients between groups, we were concerned that a strategy of enrolling that target number in one group and thereafter only accumulating patients in the other group, might introduce a bias in enrollment as treatment strategies varied over time. Accordingly, the below sample size curve was constructed to determine the requisite sample size, yet accommodating a number of potential Discharged:Mortality accrual ratios. The below power calculations are based on an 80% chance of detecting, as significant at the 5% level, an increase in the primary outcome from 3% in the Discharged group to 17% in the Mortality group. For example, a sufficient sample size would be 46 patients in the Mortality group, and 101 in the Discharged group.

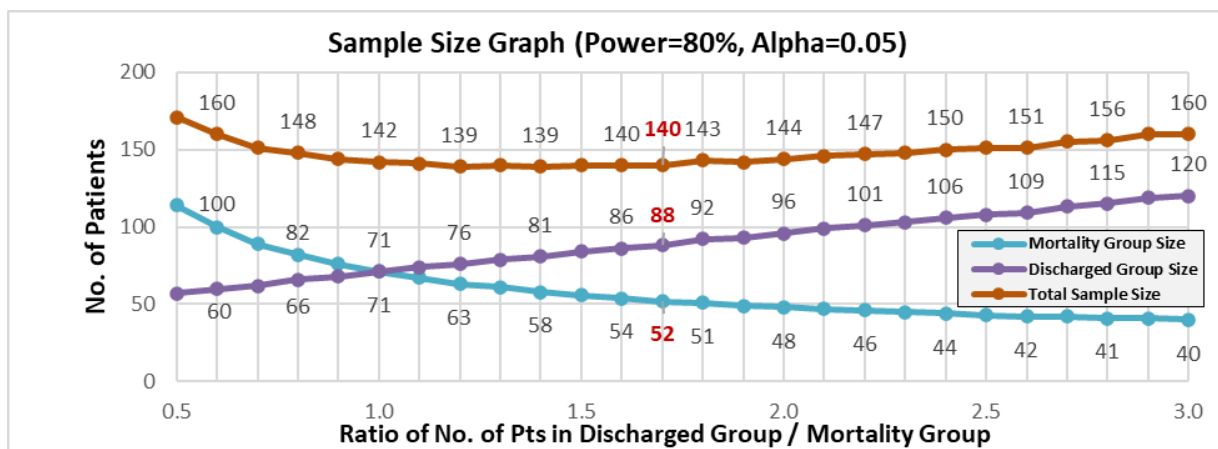

**Table S1: Telemetry vs No Telemetry Patients that Died: Selected Demographics, Clinical and Laboratory Data & Outcomes**

| Characteristics                                   | Death – Telemetry<br>(N = 52) |                    | Death – No Telemetry<br>(n = 78) |                  | p-value       |
|---------------------------------------------------|-------------------------------|--------------------|----------------------------------|------------------|---------------|
|                                                   | No. with Available Data       | Value              | No. with Available Data          | Value            |               |
| Median age (IQR) – year                           | 52                            | 71 (58 – 78)       | 78                               | 76 (63-87)       | <b>0.03</b>   |
| Male gender (%)                                   | 52                            | 38 (73)            | 78                               | 39 (50)          | <b>0.01</b>   |
| Body mass-index, median (IQR)                     | 52                            | 29.7 (26.7 – 35.2) | 75                               | 27.5 (23.9-32.5) | <b>0.03</b>   |
| <b>Comorbidities – no. (%)</b>                    |                               |                    |                                  |                  |               |
| Obesity (Body mass-index $\geq$ 30)               | 52                            | 25 (48)            | 75                               | 30 (38)          | 0.30          |
| Chronic kidney disease                            | 52                            | 13 (25)            | 78                               | 17 (22)          | 0.67          |
| Chronic dialysis                                  | 52                            | 4 (8)              | 78                               | 10 (13)          | 0.40          |
| <b>Laboratory Data – On Admission *</b>           |                               |                    |                                  |                  |               |
| D-dimer                                           |                               |                    |                                  |                  |               |
| On admission, $\mu$ g/mL                          | 45                            | 2.4 (1.0 – 4.2)    | 72                               | 2.5 (1.4-6.0)    | 0.50          |
| Troponin-I                                        |                               |                    |                                  |                  |               |
| On admission, ng/mL                               | 49                            | 0.03 (0.01 – 0.21) | 75                               | 0.04 (0.02-0.2)  | 0.70          |
| Peak level, ng/mL                                 | 47                            | 0.27 (0.06 – 2.1)  | 64                               | 0.08 (0.03-0.39) | <b>0.02</b>   |
| C-reactive protein, mg/L                          | 49                            | 146 (61 – 219)     | 72                               | 163 (103-232)    | 0.23          |
| <b>Complications</b>                              |                               |                    |                                  |                  |               |
| Myocardial injury – no. (%)                       | 52                            | 39 (75)            | 63                               | 47(60)           | 0.09          |
| Palliative Care – no. (%)                         | 52                            | 20 (38)            | 78                               | 38 (49)          | 0.30          |
| <b>Composite Primary Outcomes</b>                 |                               |                    |                                  |                  |               |
| Total – no. (%)                                   | 52                            | 9 (17)             | 78                               | 1 (1)            | <b>0.01</b> † |
| Ventricular Tachycardia or Fibrillation – no. (%) | 52                            | 6 (12)             | 78                               | 1 (1)            | <b>0.02</b>   |
| Atrioventricular block – no. (%)                  | 52                            | 3 (6)              | 78                               | 0 (0)            | 0.06          |
| <b>Secondary Outcome</b>                          |                               |                    |                                  |                  |               |
| Acute myocardial infarction – no. (%)             | 52                            | 4 (8)              | 78                               | 2 (3)            | 0.22          |

All values are expressed as median (IQR), unless otherwise specified.

\* Values are upon admission, unless otherwise specified.

† Poisson Regression Analysis shows a HR 13.6, 95% CI (1.7 - 107.9), p=0.01

**Table S2: Descriptive Analysis of Acute Malignant Cardiac Events, and Relationship to Death**

| Patient No.             | Event    | Comfort Care? | Outcome    | Brief Description                                                                                                            | Clinical interpretation as to whether this acute cardiac event was a primary causative factor in death? |                                                                                     |
|-------------------------|----------|---------------|------------|------------------------------------------------------------------------------------------------------------------------------|---------------------------------------------------------------------------------------------------------|-------------------------------------------------------------------------------------|
|                         |          |               |            |                                                                                                                              | Y/N                                                                                                     | Rationale                                                                           |
| <b>Mortality Group</b>  |          |               |            |                                                                                                                              |                                                                                                         |                                                                                     |
| 1                       | MI & AVB | N             | Death      | 77 yo, ARDS, renal failure, shock, ST elevation noted on telemetry prior to AVB and then arrest.                             | Y                                                                                                       |                                                                                     |
| 2                       | MI       | Y             | Death      | 92 yo, hypoxemic respiratory failure, new LBBB with elevated troponin (206), PEA arrest.                                     | Y                                                                                                       |                                                                                     |
| 3                       | AVB      | Y             | Death      | 61 yo, ESRD, shock, hyperkalemia (8.0), care withdrawn, AVB.                                                                 | N                                                                                                       | Hyperkalemic (8.0), Severe ARDS (P:F 85)                                            |
| 6                       | VT/VF    | N             | Death      | 55 yo, CABG, acute MI with VF arrest leading to VA ECMO prior to becoming COVID+ on hospital day 20. Hypoxic PEA arrest.     | N                                                                                                       | VT/VF event occurred prior to COVID infection                                       |
| 7                       | VT/VF    | N             | Death      | 50 yo, pulmonary sarcoidosis, renal failure, refractory metabolic and respiratory acidosis, VF arrest.                       | N                                                                                                       | Acidosis (pH 7.05), Hyperkalemia (6.3)                                              |
| 8                       | VT/VF    | N             | Death      | 64 yo, DM2, DKA with acidosis and hyperkalemia with PMVT/VF arrest.                                                          | N                                                                                                       | Hyperkalemia (7.4), Autopsy—pulmonary embolism                                      |
| 9                       | AVB      | N             | Death      | 58 yo, renal failure, shock, new RBBB with progressive AVB leading to arrest.                                                | N                                                                                                       | Shock (2 high dose vasopressors)                                                    |
| 11                      | VT/VF    | Y             | Death      | 74 yo, HTN, progressive hypoxia leading to VF arrest.                                                                        | N                                                                                                       | Hypoxia (Spo2 66%)                                                                  |
| 12                      | MI       | N             | Death      | 64 yo, renal failure, ARDS, inferolateral STEMI, elevated troponin (21) with refractory shock leading to PEA arrest.         | Y                                                                                                       |                                                                                     |
| 13                      | VT/VF    | N             | Death      | 68 yo, metastatic lung cancer, seizures and neutropenic fever. VF arrest during intubation.                                  | N                                                                                                       | Hypoxia (Spo2 80%)                                                                  |
| 14                      | VT/VF    | Y             | Death      | 48 yo, HIV, ARDS, refractory shock leading to VF arrest.                                                                     | N                                                                                                       | Severe ARDS (P:F 63), Shock (2 high dose vasopressors), Autopsy—pulmonary embolism. |
| 16                      | MI       | Y             | Death      | 81 yo, dementia, ST elevations in leads V2-V6, elevated troponin (12.6) and newly depressed EF (36%) (No. 5; Table S5)       | Y                                                                                                       |                                                                                     |
| <b>Discharged Group</b> |          |               |            |                                                                                                                              |                                                                                                         |                                                                                     |
| 4                       | MI       | N             | Discharged | 78 yo, HTN, presenting with shortness of breath with ST elevations in leads I, II, V2-V6 with elevated troponin (11).        |                                                                                                         |                                                                                     |
| 5                       | VT       | N             | Discharged | 88 yo, NICM (EF 35%) presenting with chest pain and pneumothorax, MMVT.                                                      |                                                                                                         |                                                                                     |
| 10                      | AVB & MI | N             | Discharged | 84 yo, ST elevations in leads II, III, aVF, 2:1 CHB with widening QRS, TVP placed and conduction recovered.                  |                                                                                                         |                                                                                     |
| 15                      | AVB      | N             | Discharged | 65 yo, w/ CHB elevated troponin (10.2), EF 32% with subacute lesion on angiography, required a pacemaker. ( No. 4; Table S5) |                                                                                                         |                                                                                     |

**Table S3: Descriptive Analysis of Patients with AV block**

| Pt No. (based on Table S2) | Age (yrs) | Gender | Baseline QRS duration | Intubation | Time course of AV block (days) | Escape rhythm | TVP | PPM | Outcomes   | Arrhythmia at time of death | Pertinent clinical history                                                        |
|----------------------------|-----------|--------|-----------------------|------------|--------------------------------|---------------|-----|-----|------------|-----------------------------|-----------------------------------------------------------------------------------|
| 1                          | 77        | Male   | Narrow                | Yes        | 6                              | No escape     | No  | No  | Death      | PEA                         | Inferior-lateral ST-elevation                                                     |
| 3                          | 61        | Male   | Narrow                | Yes        | 1                              | Wide escape   | No  | No  | Death      | PEA                         | Hx ESRD w/hyperkalemia (K <sup>+</sup> =8 meq/L).                                 |
| 9                          | 58        | Male   | Narrow                | Yes        | 8                              | Wide (LBBB)   | No  | No  | Death      | PEA                         | Shock (2 high dose vasopressors)                                                  |
| 10                         | 84        | Male   | IVCD                  | No         | 4                              | Wide (LBBB)   | Yes | No  | Discharged | -                           | Inferior STEMI                                                                    |
| 15                         | 65        | Female | Narrow                | No         | 1                              | Wide (LBBB)   | Yes | Yes | Discharged | -                           | NSTEMI. Coronary angiogram showed diffuse disease, no intervention was performed. |

TVP: Transvenous pacemaker; PPM: Permanent pacemaker; ESRD: End stage renal disease; IVCD: Intraventricular conduction delay; PEA: Pulseless electrical activity

**Table S4: Predictors of Mortality – Univariable Analysis**

| <b>Factor</b>                             | <b>Death<br/>(N=52)</b> | <b>Survived<br/>(N=88)</b> | <b>P-value</b>    |
|-------------------------------------------|-------------------------|----------------------------|-------------------|
| Age>65 yes, N (%)                         | 30 (58)                 | 29 (33)                    | <b>0.005</b>      |
| Coronary artery disease, N (%)            | 13 (25)                 | 22 (25)                    | 1.0               |
| Hypertension, N (%)                       | 35 (67)                 | 51 (58)                    | 0.3               |
| Obesity, N (%)                            | 25 (48)                 | 27 (31)                    | <b>0.05</b>       |
| Admission creatinine >1.5 mg/dl, N (%)    | 16 (31)                 | 17 (19)                    | 0.1               |
| Myocardial injury †, N (%)                | 23 (44)                 | 21 (24)                    | <b>0.01</b>       |
| Admission D-dimer>1 µg/m, L, N (%)        | 34 (65)                 | 45 (51)                    | 0.1               |
| Admission IL-6>100 pg/ml, N (%)           | 26 (50)                 | 21 (24)                    | <b>0.003</b>      |
| Vasopressor during hospitalization, N (%) | 36 (71)                 | 10 (12)                    | <b>&lt;0.0001</b> |
| ARDS, N (%)                               | 34 (66)                 | 8 (9)                      | <b>&lt;0.0001</b> |
| Composite Primary Outcomes, N (%)         | 9 (17)                  | 3 (3)                      | <b>0.009</b>      |

† Based on peak Troponin I value.



**Table S5: Predictors of Mortality – Multivariable Binary Logistic Regression Analysis \***

| <b>Factor</b>                      | <b>Hazard Ratio (95% CI)</b> | <b>p-value</b>    |
|------------------------------------|------------------------------|-------------------|
| Age>65 yes                         | 3.10 (1.10-9.37)             | <b>0.05</b>       |
| Obesity                            | 1.11 (0.38-3.30)             | 0.84              |
| Myocardial injury †                | 2.26 (0.72-7.10)             | 0.16              |
| Admission IL-6>100 pg/mL           | 1.27 (0.40-4.10)             | 0.68              |
| Vasopressor during hospitalization | 4.97 (1.44-17.10)            | <b>0.01</b>       |
| ARDS                               | 12.93 (3.20-52.17)           | <b>&lt;0.0001</b> |

\* Multivariable binary logistic regression analysis was performed to calculate the odds ratio to estimate the association of risk between mortality and various covariates. The dependent variable in the model was mortality. Those variables which were significant on univariable analysis and had  $\geq 10$  events were included in the multivariable model. All covariates were considered as categorical variables.

† Based on peak Troponin I value.

**Table S6:** 12-Lead Electrocardiographic and Telemetric Monitoring

| Characteristics                                                    | All Patients<br>(N=140) | Death<br>(N=52) | Survived<br>(N=88) | p-value     |
|--------------------------------------------------------------------|-------------------------|-----------------|--------------------|-------------|
| <b>Baseline Electrocardiogram</b>                                  |                         |                 |                    |             |
| Heart rate/min, median (IQR)                                       | 88 (75 – 103)           | 88 (76 – 107)   | 88 (73 – 102)      | 0.6         |
| <b>Rhythm</b>                                                      |                         |                 |                    |             |
| Normal sinus rhythm – no. (%)                                      | 98 (70)                 | 30 (58)         | 68 (77)            | <b>0.02</b> |
| Sinus tachycardia – no. (%)                                        | 18 (13)                 | 10 (19)         | 8 (9)              | 0.1         |
| Atrial fibrillation – no. (%)                                      | 14 (10)                 | 9 (17)          | 5 (6)              | <b>0.04</b> |
| Other – no. (%)                                                    | 10 (10)                 | 3 (6)           | 7 (8)              | 0.7         |
| Duration of PR interval – msec                                     | 150 (135 – 168)         | 152 (134 – 196) | 147 (137 – 166)    | 0.4         |
| Duration of QRS interval – msec                                    | 88 (80 – 100)           | 90 (77 – 110)   | 86 (80 – 98)       | 0.3         |
| Duration of QT <sub>C</sub> interval – msec                        | 443 (425 – 470)         | 444 (425 – 486) | 442 (425 – 464)    | 0.3         |
| Right bundle branch block – no. (%)                                | 11 (8)                  | 6 (11)          | 5 (6)              | 0.3         |
| Left bundle branch block – no. (%)                                 | 1 (1)                   | 1 (2)           | 0                  | 0.4         |
| Intraventricular conduction delay – no. (%)                        | 9 (6)                   | 5 (10)          | 4 (4.5)            | 0.3         |
| Presence of ST-T changes – no. (%)                                 | 53 (38)                 | 22 (42)         | 31 (35)            | 0.4         |
| <b>Last Electrocardiogram prior to death or hospital discharge</b> |                         |                 |                    |             |
| <b>Rhythm</b>                                                      |                         |                 |                    |             |
| Normal sinus rhythm – no. (%)                                      | 88 (63)                 | 31 (60)         | 57 (65)            | 0.6         |
| Sinus tachycardia – no. (%)                                        | 34 (24)                 | 13 (25)         | 21 (24)            | 1.0         |
| Atrial fibrillation – no. (%)                                      | 11 (8)                  | 5 (10)          | 6 (7)              | 0.6         |
| Other – no. (%)                                                    | 7 (5)                   | 3 (6)           | 4 (5)              | 0.1         |
| Duration of QT <sub>C</sub> interval – msec                        | 450 (432 – 477)         | 458 (417 – 490) | 449 (433 – 473)    | 0.5         |
| No. with QT <sub>C</sub> increase by $\geq$ 50 msec – a no. (%)    | 13 (9)                  | 7 (13)          | 6 (7)              | 0.20        |
| <b>Presence of new ST-T changes – no. (%)</b>                      |                         |                 |                    |             |
| ST-elevation – no. (%)                                             | 2 (1)                   | 0 (0)           | 2 (2)              | 0.5         |
| ST-depression – no. (%)                                            | 7 (5)                   | 1 (2)           | 6 (7)              | 0.4         |
| T-wave inversion – no. (%)                                         | 15 (4)                  | 7 (13)          | 8 (9)              | 0.4         |
| <b>Markers of new right ventricular strain</b>                     |                         |                 |                    |             |

|                                                                             |                |               |               |                   |
|-----------------------------------------------------------------------------|----------------|---------------|---------------|-------------------|
| Right axis deviation – no. (%)                                              | 3 (2)          | 2 (4)         | 1 (1)         | 0.5               |
| Right Bundle Branch Block – no. (%)                                         | 2 (1)          | 1 (2)         | 1 (1)         | 1.0               |
| ST-T changes in leads V1-V4 – no. (%)                                       | 3 (2)          | 0             | 3 (3)         | 0.3               |
| ST-T changes in inferior leads – no. (%)                                    | 8 (6)          | 5 (10)        | 3 (3)         | 0.15              |
| Met >1 criterion for S <sub>1</sub> Q <sub>3</sub> T <sub>3</sub> – no. (%) | 3 (2)          | 0             | 3 (3)         | 0.3               |
| <b>Telemetry</b>                                                            |                |               |               |                   |
| Duration of continuous monitoring, hours                                    | 120 (72 – 168) | 120(72 – 192) | 120 (48– 168) | 0.32              |
| Atrial arrhythmias – no. (%)                                                |                |               |               |                   |
| Atrial fibrillation or flutter – no. (%)                                    | 28 (20)        | 18 (35)       | 10 (11)       | <b>0.002</b>      |
| Atrial fibrillation – no. (%)                                               | 24 (17)        | 15 (28)       | 9 (11)        | <b>0.009</b>      |
| Atrial flutter – no (%)                                                     | 6 (4)          | 5 (10)        | 1 (1)         | <b>0.03</b>       |
| Atrial tachycardia – no. (%)                                                | 40 (28)        | 18 (35)       | 22 (25)       | 0.24              |
| Supraventricular tachycardia – no. (%)                                      | 4 (3)          | 3 (6)         | 1 (1)         | 0.10              |
| Ventricular arrhythmias – no. (%)                                           |                |               |               |                   |
| Monomorphic Ventricular tachycardia – no. (%)                               | 1 (1)          | 0 (0)         | 1 (1)         | 1.00              |
| Ventricular fibrillation – no. (%)                                          | 6 (4)          | 6 (11)        | 0 (0)         | <b>0.01</b>       |
| Premature ventricular contractions (PVC) – no. (%)                          |                |               |               |                   |
| Occasional isolated PVCs– no. (%)                                           | 23 (16)        | 11 (21)       | 12 (14)       | 0.24              |
| PVCs >1/min – no. (%)                                                       | 14 (10)        | 4 (8)         | 10 (11)       | 0.60              |
| Multiform PVCs – no. (%)                                                    | 4 (3)          | 1 (2)         | 3 (3)         | 1.00              |
| Couplets – no. (%)                                                          | 3 (2)          | 2 (4)         | 1 (1)         | 0.55              |
| Non-sustained ventricular tachycardia – no. (%)                             | 9 (6)          | 5 (10)        | 4 (4.5)       | 0.30              |
| Bradycardias – no. (%)                                                      |                |               |               |                   |
| Atrioventricular Block – no. (%)                                            | 5 (3.5)        | 3 (6)         | 2 (2)         | 1.00              |
| Pulseless Electrical Activity – no. (%)                                     | 46 (33)        | 46 (88)       | 0 (0)         | <b>&lt;0.0001</b> |

All values are expressed as median (IQR), unless otherwise specified.

**Table S7: Descriptive Analysis of Available Echocardiographic Imaging**

| Patient No. | Outcome    | Indication for Echocardiogram                                                                                       | Echocardiogram Findings                                                                                                            |
|-------------|------------|---------------------------------------------------------------------------------------------------------------------|------------------------------------------------------------------------------------------------------------------------------------|
| 1           | Discharged | 49 yo, prior CVA p/w aphasia with acute stroke on CTA s/p thrombectomy.                                             | Normal biventricular size and function, no valvular pathology or intracardiac mass. No intracardiac shunting with agitated saline. |
| 2           | Death      | 67 yo, lung cancer with worsening shock and pericardial effusion on POCUS. TTE performed during pericardiocentesis. | Confirmed presence of effusion. Normal left ventricular size and function.                                                         |
| 3           | Discharged | 46 yo, shortness of breath with persistent sinus tachycardia.                                                       | Normal Biventricular size and function.                                                                                            |
| 4           | Discharged | 65 yo, w/ CHB elevated troponin (10.2), EKG absent clear ischemic changes ( <b>No. 15 on Table S2</b> ).            | EF 32% with hypocontractile septum inferior and apical walls.                                                                      |
| 5           | Death      | 81 yo, dementia, ST elevations in leads V2-V6, elevated troponin (12.6) ( <b>No. 4 on Table S2</b> ).               | Newly depressed EF 36%, hypocontractile apex and anteroseptal walls.                                                               |
| 6           | Death      | 59 yo, Afib on Xarelto with progressive dyspnea and lower extremity edema. Suffered PEA arrest.                     | Normal biventricular size and function, no valvular abnormalities.                                                                 |
| 7           | Discharged | 26 yo, elevated transaminases.                                                                                      | Normal biventricular size and function, no valvular abnormalities.                                                                 |
| 8           | Discharged | 37 yo, aphasia and right sided weakness, CTA with distal acute stroke.                                              | Normal biventricular size and function, agitated saline study demonstrating early left sided bubbles.                              |
| 9           | Death      | 72 yo, with elevated troponin (10.3), borderline EKG changes.                                                       | Normal biventricular size and function. No segmental wall motion abnormalities                                                     |

**Figure S1: Cardiac Arrhythmias.** Shown are example of the onset of ventricular fibrillation (A) and atrio-ventricular block in the setting of an acute myocardial infarction (B). For the latter, the p waves are indicated by the asterisks, and the arrows denote the QRS complexes with ST elevation.

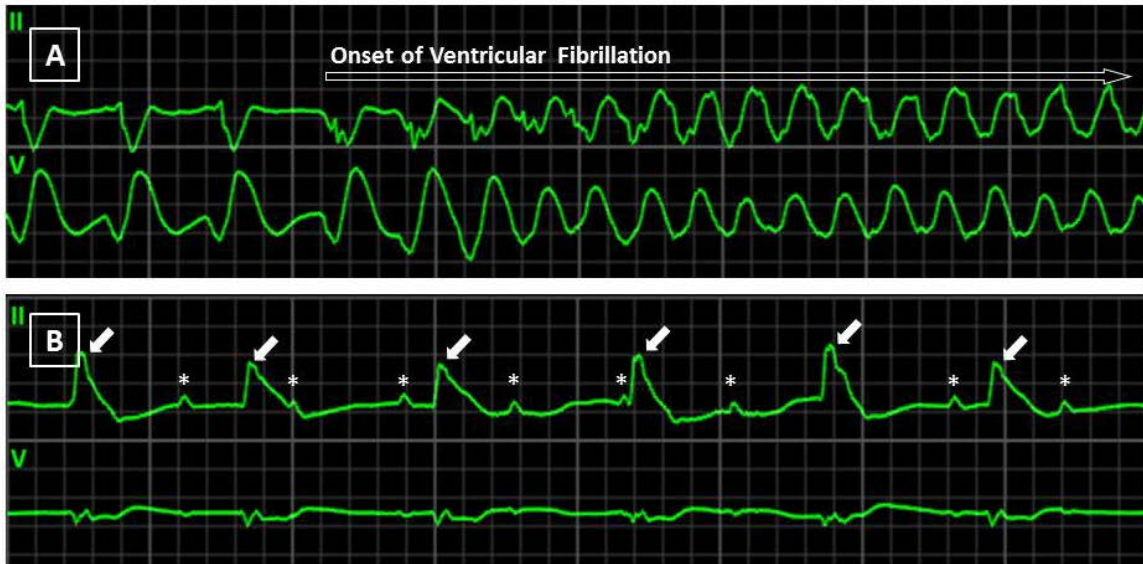

## **References**

- 1) Wang D, Hu B, Hu C, Zhu F, Liu X, Zhang J, Wang B, Xiang H, Cheng Z, Xiong Y et al. Clinical characteristics of 138 hospitalized patients with 2019 novel coronavirus-infected pneumonia in Wuhan, China. *JAMA*. 2020;323:1061-1069.
- 2) Guo T, Fan Y, Chen M, Wu X, Zhang L, He T, Wang H, Wan J, Wang X, Lu Z. Cardiovascular Implications of Fatal Outcomes of Patients with Coronavirus Disease 2019 (COVID-19). *JAMA Cardiol*. 2020;e201017. doi: 10.1001/jamacardio.2020.1017
